# Supplementary material for: Clinical features and prognostic factors of elderly patients with metastatic pancreatic cancer: a population-based study
Source: publisher site journal article supplement (doi:10.18632/aging.202570), 2021-02-26
Supplement: Supplementary file [file aging-v13i5-202570-supplementary-material-SD1.pdf]

## SUPPLEMENTARY FIGURES

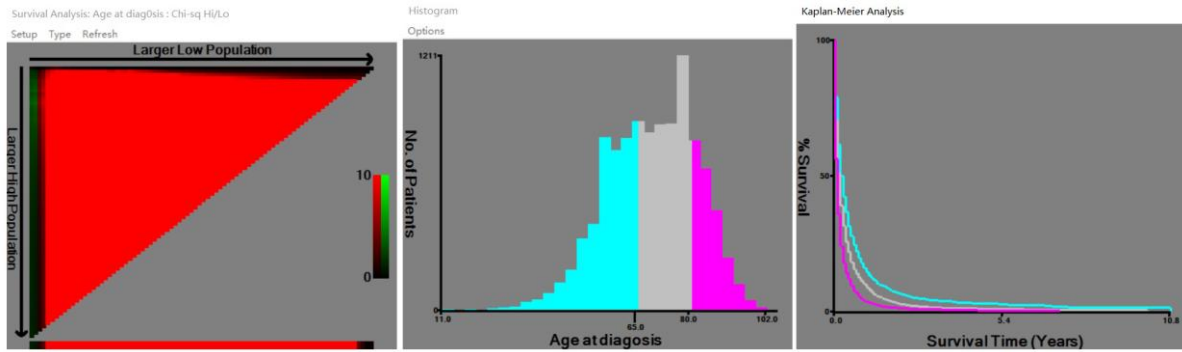

**Supplementary Figure 1.** Estimation of the cutoff values for age stratification as determined by X-tile software. The ages of 65 and 80 years old were appropriate cutoff values for age at diagnosis.

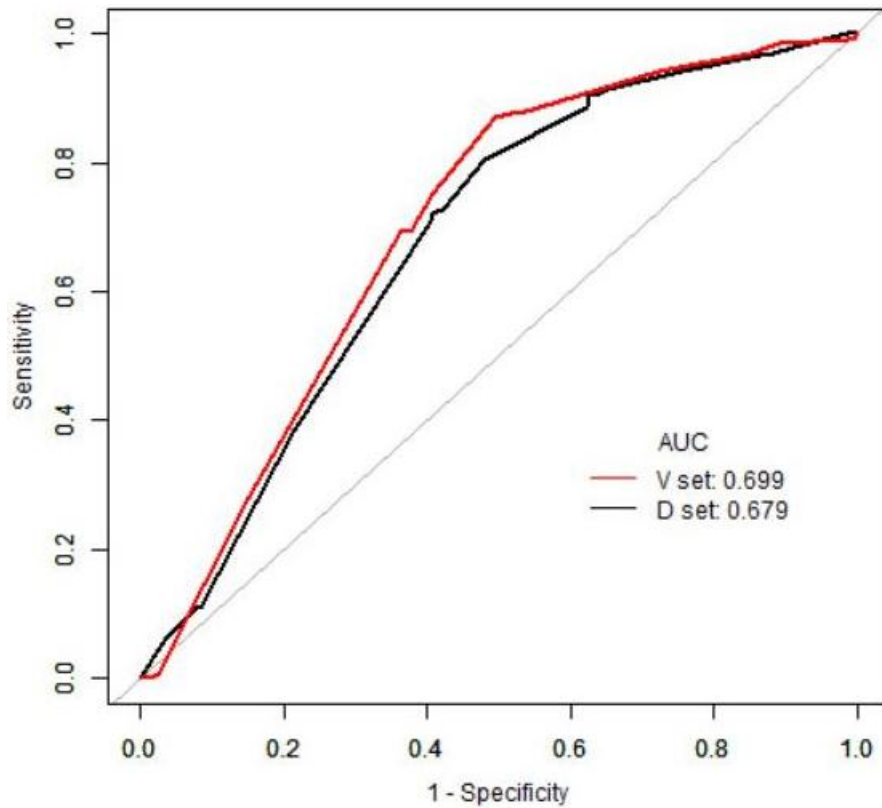

**Supplementary Figure 2.** Receiver operating characteristic (ROC) curves for development dataset (2010-2014) and validation dataset (2015).

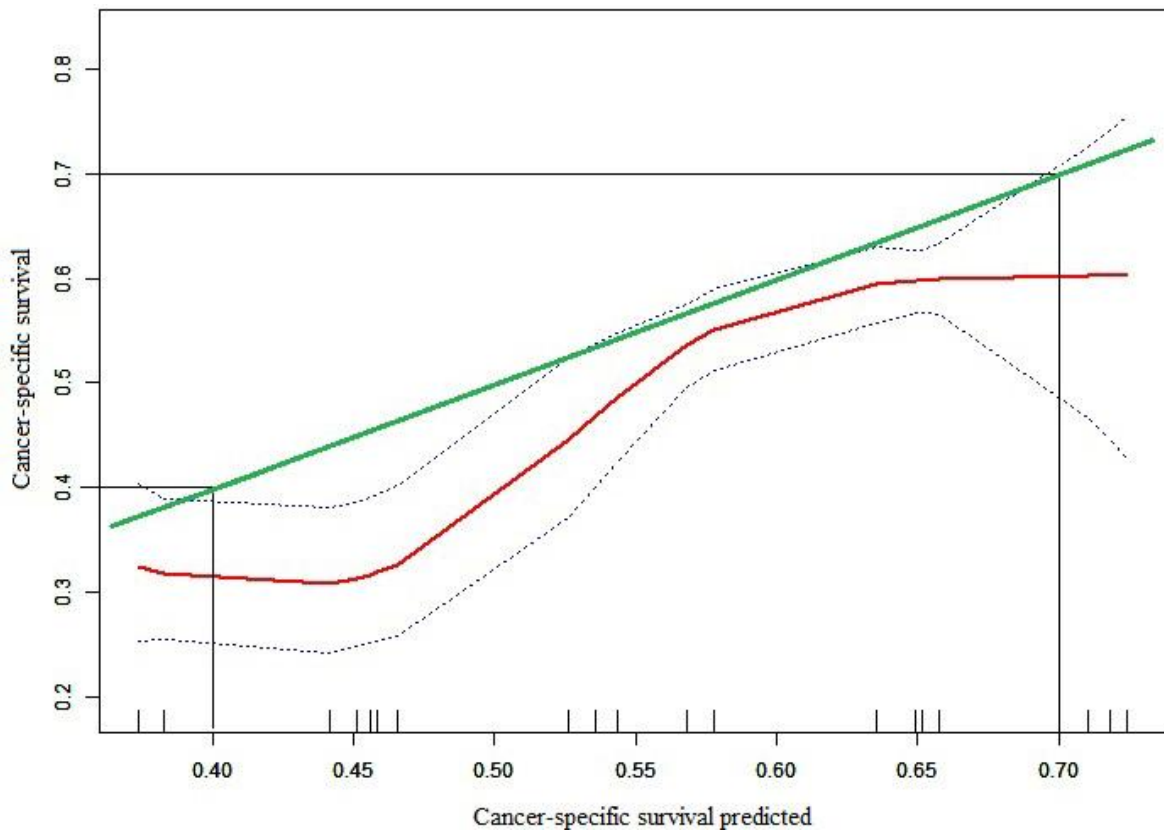

Supplementary Figure 3. Calibration curve for CCS rate plotted against predicted probability of CCS at 3-year after diagnosis.
