# Supplementary material for: Clinical features and prognostic factors of elderly patients with metastatic pancreatic cancer: a population-based study
Source: Aging (Albany NY). 2021 Feb 26;13(5):7133–46. doi: 10.18632/aging.202570 (PMC7993726; doi:10.18632/aging.202570)
Supplement: Supplementary Table 1 [file aging-13-202570-s002.pdf]

## SUPPLEMENTARY TABLE

Supplementary Table 1. Characteristic of patients with metastatic pancreatic cancer.

| Year of diagnosis           | 2004-2009     | 2010-2014     | 2015          |
|-----------------------------|---------------|---------------|---------------|
| <b>Features of Patients</b> | 5321(100.0%)  | 5463(100.0%)  | 5760(100.0%)  |
| <b>Marital status</b>       |               |               |               |
| Other                       | 2625 (49.33%) | 2830 (51.80%) | 2681 (46.55%) |
| Married                     | 2606 (50.67%) | 2633 (48.20%) | 3079 (53.45%) |
| <b>Age</b>                  |               |               |               |
| <65                         | 1912 (35.93%) | 1769 (32.38%) | 2018 (35.03%) |
| ≥65 and <80                 | 2177 (40.91%) | 2238 (40.97%) | 2606 (45.24%) |
| ≥80                         | 1232 (23.15%) | 1456 (26.65%) | 1136 (19.72%) |
| <b>Race</b>                 |               |               |               |
| Other                       | 1106 (20.79%) | 1118 (20.46%) | 1227 (21.30%) |
| White                       | 4215 (79.21%) | 4345 (79.54%) | 4533 (78.70%) |
| <b>Sex</b>                  |               |               |               |
| Male                        | 2712 (50.97%) | 2861 (52.37%) | 3055 (53.04%) |
| Female                      | 2609 (49.03%) | 2602 (47.63%) | 2705 (46.96%) |
| <b>T stage</b>              |               |               |               |
| T0                          | 232 (4.36%)   | 283 (5.18%)   | 61 (1.06%)    |
| T1                          | 40 (0.75%)    | 63 (1.15%)    | 155 (2.69%)   |
| T2                          | 289 (5.43%)   | 477 (8.73%)   | 1535 (26.65%) |
| T3                          | 479 (9.00%)   | 553 (10.12%)  | 1574 (27.33%) |
| T4                          | 590 (11.09%)  | 614 (11.24%)  | 886 (15.38%)  |
| Tx                          | 3691 (69.37%) | 3473 (63.57%) | 1549 (26.89%) |
| <b>N stage</b>              |               |               |               |
| N0                          | 1577 (29.64%) | 2048 (37.49%) | 2796 (48.54%) |
| N1                          | 883 (16.59%)  | 1242 (22.73%) | 1972 (34.24%) |
| Nx                          | 2861 (53.77%) | 2173 (39.78%) | 992 (17.22%)  |
| <b>Surgery</b>              |               |               |               |
| No                          | 4994 (93.85%) | 5129 (93.89%) | 5731 (99.50%) |
| Yes                         | 285 (5.36%)   | 266 (4.87%)   | 10 (0.17%)    |
| Unknown                     | 42 (0.79%)    | 68 (1.24%)    | 19 (0.33%)    |
| <b>Radiation</b>            |               |               |               |
| No                          | 5101 (95.87%) | 5249 (96.08%) | 5542 (96.22%) |
| Yes                         | 220 (4.13%)   | 214 (3.92%)   | 218 (3.78%)   |
| <b>Chemotherapy</b>         |               |               |               |
| No                          | 3407 (64.03%) | 3494 (63.96%) | 2962 (51.42%) |
| Yes                         | 1914 (35.97%) | 1969 (36.04%) | 2798 (48.58%) |
| <b>OS</b>                   |               |               |               |
| Live                        | 89 (1.67%)    | 506 (9.26%)   | 2283 (39.64%) |
| Dead                        | 5232 (98.33%) | 4957 (90.74%) | 3477 (60.36%) |
| <b>CCS</b>                  |               |               |               |
| others                      | 370 (6.95%)   | 1734 (31.74%) | 3091 (53.66%) |
| <b>Dead of PC</b>           | 4951 (93.05%) | 3729 (68.26%) | 2669 (46.34%) |
| <b>Bone</b>                 |               |               |               |
| No                          | 0 (%)         | 4318 (79.04%) | 5096 (88.47%) |
| Yes                         | 0 (%)         | 480 (8.79%)   | 443 (7.69%)   |
| unknown                     | 0 (%)         | 665 (12.17%)  | 221 (3.84%)   |
| <b>Brain</b>                |               |               |               |
| No                          | 0 (%)         | 4702 (86.07%) | 5519 (95.82%) |
| Yes                         | 0 (%)         | 67 (1.23%)    | 26 (0.45%)    |
| unknown                     | 0 (%)         | 694 (12.70%)  | 215 (3.73%)   |
| <b>Liver</b>                |               |               |               |
| No                          | 0 (%)         | 1217 (22.28%) | 1160 (20.14%) |
| Yes                         | 0 (%)         | 3892 (71.24%) | 4511 (78.32%) |

|                |       |               |               |
|----------------|-------|---------------|---------------|
| <b>unknown</b> | 0 (%) | 354 (6.48%)   | 89 (1.55%)    |
| <b>Lung</b>    |       |               |               |
| <b>No</b>      | 0 (%) | 3627 (66.39%) | 4252 (73.82%) |
| <b>Yes</b>     | 0 (%) | 1165 (21.33%) | 1245 (21.61%) |
| <b>unknown</b> | 0 (%) | 671 (12.28%)  | 263 (4.57%)   |

OS: overall survival; CSS: cancer-specific survival; PC: pancreatic cancer.
